# Supplementary material for: Identification of Extremely Rare Pathogenic CNVs by Array CGH in Saudi Children with Developmental Delay, Congenital Malformations, and Intellectual Disability
Source: MDPI journal article supplement (doi:10.3390/children10040662), 2023-03-31
Supplement: s1 [file s1]

**Table S1.** Clinical information of pediatric developmental delay, congenital malfunction, and intellectual disability patients included in this study.

| S. No | Biobank Code | Gender | Age       | Array Type    | Symptoms/Phenotypes                                                                                                   |
|-------|--------------|--------|-----------|---------------|-----------------------------------------------------------------------------------------------------------------------|
| 1     | BL-022-12    | Female | 5 years   | CGH 1 × 244 A | Dysmorphic Feature                                                                                                    |
| 2     | BL-025-14    | Male   | 6.8 years | CGH2 × 400 k  | Intellectual Disability, Congenital Heart Disease, Hypospadias, Dysmorphic Feature                                    |
| 3     | BL-034-13    | Female | 3 years   | CGH2 × 400 k  | Central Hypotonia, Microcephaly                                                                                       |
| 4     | BL-047-13    | Male   | 1.8 years | CGH2 × 400 k  | Congenital heart disease, Dysmorphic Feature                                                                          |
| 5     | BL-080-12    | Male   | 4 years   | CGH2 × 400 k  | Delayed Speech, Dysmorphic Features                                                                                   |
| 6     | BL-099-12    | Male   | 2 years   | CGH2 × 400 k  | Dysmorphic Feature, Intellectual Disability                                                                           |
| 7     | BL-104-13    | Male   | 1 years   | CGH2 × 400 k  | Hypotonia, Undescended Testis, Talipes, High Arched Palate                                                            |
| 8     | BL-144-12    | Female | 4 years   | CGH2 × 400 k  | Obesity, Congenital Heart Disease, Normal Milestones                                                                  |
| 9     | BL-161-14    | Female | 1 years   | CGH2 × 400 k  | VSD, Failure to thrive                                                                                                |
| 10    | BL-168-13    | Male   | 6 years   | CGH 1 × 244 A | Dysmorphic Features                                                                                                   |
| 11    | BL-181-13    | Female | 2.6 years | CGH2 × 400 k  | Hypotonia, Cleft Lip, VSD, ASD, Pulmonary Stenosis, Dysmorphic, Delayed Speech, Not Walking                           |
| 12    | BL-186-12    | Male   | 1.7 years | CGH2 × 400 k  | Dysmorphic feature                                                                                                    |
| 13    | BL-208-13    | Female | 2.6 years | CGH2 × 400 k  | Spinal Muscular Atrophy.                                                                                              |
| 14    | BL-209-13    | Male   | 7.9 years | CGH 1 × 244 A | Fragile X Syndrome, Autism                                                                                            |
| 15    | BL-210-12    | Female | 6 years   | CGH 1 × 244 A | Delayed Speech                                                                                                        |
| 16    | BL-211-14    | Male   | 5 years   | CGH2 × 400 k  | Dysmorphic feature                                                                                                    |
| 17    | BL-224-12    | Male   | 2.3 years | CGH2 × 400 k  | Microcephaly, Dysmorphic, Brain Atrophy                                                                               |
| 18    | BL-346-12    | Male   | 5 years   | CGH2 × 400 k  | Delayed Speech, Dysmorphic feature                                                                                    |
| 19    | BL-363-12    | Male   | 2 years   | CGH2 × 400 k  | Delayed Speech, Dysmorphic feature                                                                                    |
| 20    | BL-376-13    | Male   | 9 years   | CGH 1 × 244 A | Hypogonadism, Microcephaly, Prader Willi Syndrome                                                                     |
| 21    | BL-394-12    | Male   | 4.7 years | CGH2 × 400 k  | Dysmorphic feature                                                                                                    |
| 22    | BL-401-13    | Female | 8 days    | CGH 1 × 244 A | Congenital Heart Disease, Dysmorphic feature                                                                          |
| 23    | BL-411-12    | Female | 5 years   | CGH 1 × 244 A | Dysmorphic feature                                                                                                    |
| 24    | BL-422-12    | Female | 8 years   | CGH2 × 400 k  | Intellectual Disability, Delayed Speech,                                                                              |
| 25    | BL-437-11    | Male   | 4 years   | CGH2 × 400 k  | Delayed Walking, Unstable, Muscle Wasting                                                                             |
| 26    | BL-457-12    | Male   | 2 years   | CGH 1 × 244 A | DD, not walking, no speech, dysmorphic, hypotonia, epilepsy, microcephaly, preterm birth at 2 weeks, VSD at birth     |
| 27    | BL-461-12    | Male   | 4 months  | CGH 1 × 244 A | Dysmorphic Feature, Small for date, DD, failure to thrive, small finger has two phalanges, simian crease in left hand |
| 28    | BL-464-12    | Female | 1.5 years | CGH2 × 400 k  | Short Stature                                                                                                         |
| 29    | BL-504-13    | Male   | 1.6 years | CGH 1 × 244 A | Dysmorphic, Brain Atrophy, Muscle Dystrophy, Not Walking, No Speech                                                   |
| 30    | BL-518-13    | Female | 8 years   | CGH2 × 400 k  | Congenital Heart Disease                                                                                              |
| 31    | BL-525-13    | Female | 3.4 years | CGH2 × 400 k  | Delayed Speech, Delayed Walking, Hypotonia,                                                                           |
| 32    | BL-597-12    | Female | 1 month   | CGH2 × 400 k  | Dysmorphic feature, Low-set Ears, Closed VSD                                                                          |
| 33    | BL-611-12    | Male   | 6 months  | CGH2 × 400 k  | Hypotonia                                                                                                             |
| 34    | BL-622-12    | Male   | 7 years   | CGH 1 × 244 A | Dysmorphic feature                                                                                                    |

|    |            |        |           |              |                                                                                                                                                       |
|----|------------|--------|-----------|--------------|-------------------------------------------------------------------------------------------------------------------------------------------------------|
| 35 | BL-628-12  | Female | 29 days   | CGH2 × 400 k | Ambiguous Genitalia, Dysmorphic                                                                                                                       |
| 36 | BL-642-12  | Male   | 6 years   | CGH2 × 400 k | Fragile X syndrome                                                                                                                                    |
| 37 | BL-664-11  | Female | 10 months | CGH2 × 400 k | Congenital Heart Disease                                                                                                                              |
| 38 | BL-674-11  | Female | 2 years   | CGH2 × 400 k | Developmental Delay                                                                                                                                   |
| 39 | BL-681-12  | Female | 3.6 years | CGH2 × 400 k | Delayed Speech, Dysmorphic Feature, Mental Disability                                                                                                 |
| 40 | BL-683-12  | Male   | 4.7 years | CGH2 × 400 k | Dysmorphic feature                                                                                                                                    |
| 41 | BL-723-13  | Male   | 8 months  | CGH2 × 400 k | GH Deficiency                                                                                                                                         |
| 42 | BL-793-13  | Male   | 3 months  | CGH2 × 400 k | Congenital heart disease, DiGeorge Syndrome                                                                                                           |
| 43 | BL-853-12  | Female | 1.7 years | CGH2 × 400 k | Congenital Heart Disease, ASD, PWS                                                                                                                    |
| 44 | BL-900-12  | Male   | 8 months  | CGH2 × 400 k | Hirschsprung Disease, Dilated Lat. Ventricle                                                                                                          |
| 45 | BL-901-12  | Male   | 9.5 years | CGH2 × 400 k | Hypospadias, Undescended Testis, VSD, Dysmorphic features                                                                                             |
| 46 | BL-902-10  | Male   | 16 years  | CGH2 × 400 k | Microcephaly, Intellectual Disability, Dysmorphic                                                                                                     |
| 47 | BL-902-12  | Male   | 4.5 years | CGH2 × 400 k | Dysmorphic features, Delayed Speech,                                                                                                                  |
| 48 | BL-954-12  | Female | 6 years   | CGH2 × 400 k | Bilateral disease, Talipes, Microcephaly                                                                                                              |
| 49 | BL-982-12  | Male   | 8 years   | CGH2 × 400 k | Intellectual Disability, Delayed Speech, Delayed Walking                                                                                              |
| 50 | BL-983-12  | Female | 2 years   | CGH2 × 400 k | Not Walking, No speech                                                                                                                                |
| 51 | BL-1019-12 | Male   | 3 years   | CGH2 × 400 k | No Walking, Delayed Speech, Seizures                                                                                                                  |
| 52 | BL-1020-12 | Male   | 3 years   | CGH2 × 400 k | Floppy, Dysmorphic, Left Axial Polydactyly                                                                                                            |
| 53 | BL-1042-12 | Female | 5.9 years | CGH2 × 400 k | Delayed Speech, Microcephaly                                                                                                                          |
| 54 | BL-1083-10 | Female | 7 months  | CGH2 × 400 k | Hypotonia, Microcephaly                                                                                                                               |
| 55 | BL-1086-11 | Male   | 6 years   | CGH2 × 400 k | Intellectual Disability, ADHD, Dysmorphic, Seizures, Small ears, Triangular face, VSD at birth, No Speech, Delayed Walking, Epilepsy                  |
| 56 | BL-1087-11 | Male   | 12 years  | CGH2 × 400 k | Dysmorphic, Hyperactive, Intellectual Disability, ADHD, Small Ears, Seizures, No Speech, Delayed Walking                                              |
| 57 | BL-1123-12 | Male   | 2.5 years | CGH2 × 400 k | Delayed Speech, Floppy baby syndrome, Dysmorphic Features, Left Axial Polydactyly                                                                     |
| 58 | BL-1138-12 | Female | 5.6 years | CGH2 × 400 k | Delayed Speech, Microcephaly, Brain Atrophy, Seizures                                                                                                 |
| 59 | BL-1140-11 | Female | 5 years   | CGH2 × 400 k | Dysmorphic features, VSD, Intellectual Disability                                                                                                     |
| 60 | BL-1178-12 | Female | 5 years   | CGH2 × 400 k | Delayed Speech                                                                                                                                        |
| 61 | BL-1288-13 | Male   | 6 years   | CGH2 × 400 k | Intellectual Disability, IQ: 65, Microcephaly, Autism, Delayed speech, Hyperactive, Delayed Walking, slightly overweight, Abnormal Teeth, Ataxic Gait |
| 62 | BL-AM-14   | Male   | 5 years   | CGH2 × 400 k | Developmental Delay                                                                                                                                   |
| 63 | BL-OY-14   | Male   | 6 years   | CGH2 × 400 k | Skeletal and cardiac abnormalities, Marfan Syndrome                                                                                                   |
